# Supplementary material for: Isoscape of amount-weighted annual mean precipitation tritium ( 3 H) activity from 1976 to 2017 for the Adriatic–Pannonian region – AP 3 H_v1 database
Source: Copernicus journal article supplement (doi:10.5194/essd-12-2061-2020), 2020-09-08
Supplement: Supplementary file [file essd-12-2061-2020-supplement-title-page.pdf › essd-12-2061-2020-supplement-title-page.pdf]

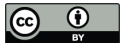

## *Supplement of*

# **Isoscape of amount-weighted annual mean precipitation tritium ( $^3\text{H}$ ) activity from 1976 to 2017 for the Adriatic–Pannonian region – AP $^3\text{H}$ \_v1 database**

**Zoltán Kern et al.**

*Correspondence to:* István Gábor Hatvani ([hatvaniig@gmail.com](mailto:hatvaniig@gmail.com))

- [essd-12-2061-2020-supplement-title-page.pdf](#)
- [AP3H\\_v1\\_animated.gif](#)
- [Ncdf\\_screening4time series.R](#)

The copyright of individual parts of the supplement might differ from the CC BY 4.0 License.
